# Supplementary material
Source: Springer Nature journal article supplement (http://www.springermedizin.de/resource/supplementary/13063_2014_2161_MOESM2_ESM.pdf/9621486)

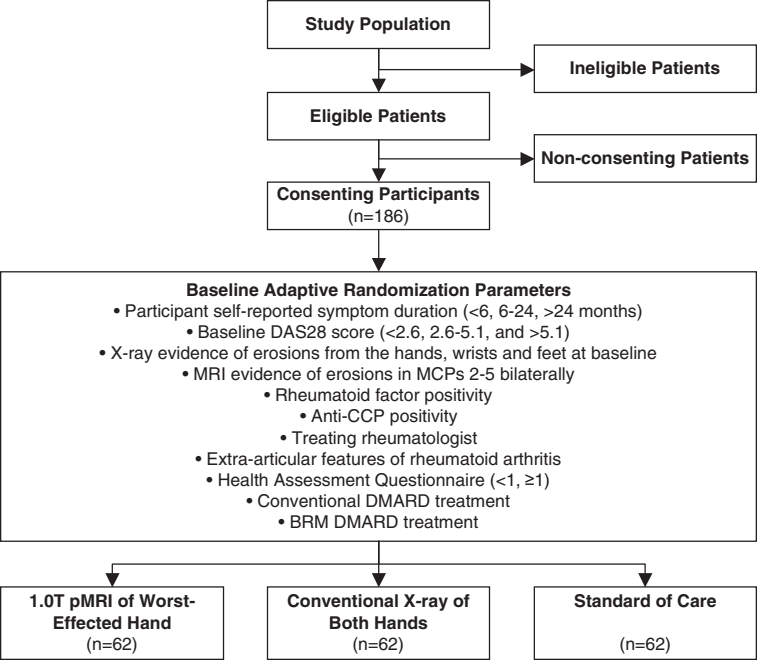

Supplement: MOESM2 [file 9621486]
